# Supplementary material for: Towards parallel fabrication of single electron transistors using carbon nanotubes
Source: Royal Society of Chemistry journal article supplement (doi:10.1039/c4nr07540d), 2015-01-01
Supplement: c4nr07540d1.pdf [file c4nr07540d1.pdf]

## Towards parallel fabrication single electron transistors using carbon nanotubes

Muhammad R. Islam<sup>a,b</sup>, Daeha Joung<sup>a,b</sup> and Saiful I. Khondaker<sup>a,b,c\*</sup>

<sup>a</sup>Nanoscience Technology Center, <sup>b</sup>Department of Physics, <sup>c</sup>School of Electrical Engineering and Computer Science, University of Central Florida, Orlando, Florida 32826, USA.

\*To whom correspondence should be addressed. E-mail: [saiful@ucf.edu](mailto:saiful@ucf.edu)

**Supplementary figure S1:** Figure S1 demonstrates the variation of room temperature resistance of 50 SET devices.

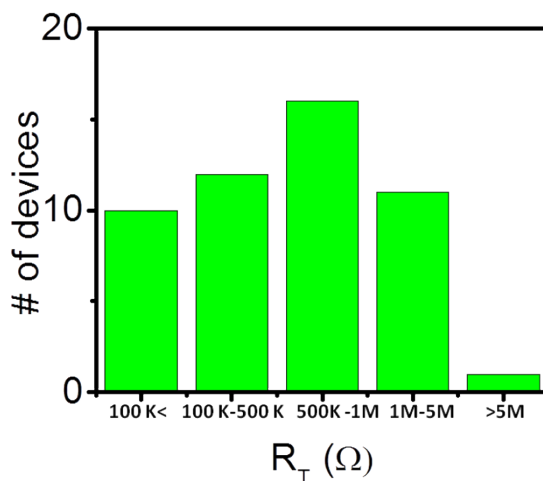

**S1.** Variation of room temperature resistance of the 100 nm metal-SWNT devices

**Supplementary table 1:** A summary of the charging energy of the top contact devices as a function of  $R_T$ . From the electron transport measurements of 50 top contact devices we found that most ( $\sim 90\%$ ) of the devices with  $100 \text{ k}\Omega < R_T < 1 \text{ M}\Omega$  shows single QD behavior with consistent charging energy ( $\sim 15 \pm 5 \text{ meV}$ ). Multiple QD behavior with high charging energy (between 15-200 meV) is observed for the devices with  $R_T > 1 \text{ M}\Omega$ .

**Table 1.** Summary of the SET devices

| $R_T$                                           | # of<br>Devices<br>measured | SET<br>observed |
|-------------------------------------------------|-----------------------------|-----------------|
| $R_T < 100 \text{ k}\Omega$                     | 10                          | 1               |
| $100 \text{ k}\Omega < R_T < 1 \text{ M}\Omega$ | 28                          | 25              |
| $R_T > 1 \text{ M}\Omega$                       | 12                          | 12              |
